# Supplementary material for: A Randomized, Double-Blind, Placebo-Controlled Trial of a Polyphenol Botanical Blend on Sleep and Daytime Functioning
Source: MDPI journal article supplement (doi:10.3390/ijerph18063044), 2021-03-16
Supplement: s1 [file s1]

| <b>Table S1: Pre-post comparisons of sleep disturbances measured by the PSQI.</b> |                |             |                |            |             |                |
|-----------------------------------------------------------------------------------|----------------|-------------|----------------|------------|-------------|----------------|
|                                                                                   | <b>Placebo</b> |             |                | <b>PBB</b> |             |                |
| <b>PSQI Component Scores</b>                                                      | <b>Pre</b>     | <b>Post</b> | <b>p-value</b> | <b>Pre</b> | <b>Post</b> | <b>p-value</b> |
| Sleep Quality                                                                     |                |             | 0.029          |            |             | >0.9           |
| 0                                                                                 | 13 (28%)       | 4 (8.7%)    |                | 6 (14%)    | 7 (17%)     |                |
| 1                                                                                 | 27 (59%)       | 38 (83%)    |                | 28 (65%)   | 28 (67%)    |                |
| 2                                                                                 | 6 (13%)        | 4 (8.7%)    |                | 8 (19%)    | 7 (17%)     |                |
| 3                                                                                 | 0 (0%)         | 0 (0%)      |                | 1 (2.3%)   | 0 (0%)      |                |
| Sleep Latency                                                                     |                |             | 0.15           |            |             | 0.061          |
| 0                                                                                 | 17 (37%)       | 21 (46%)    |                | 14 (33%)   | 16 (38%)    |                |
| 1                                                                                 | 17 (37%)       | 21 (46%)    |                | 15 (35%)   | 21 (50%)    |                |
| 2                                                                                 | 11 (24%)       | 4 (8.7%)    |                | 9 (21%)    | 5 (12%)     |                |
| 3                                                                                 | 1 (2.2%)       | 0 (0%)      |                | 5 (12%)    | 0 (0%)      |                |
| Sleep Duration                                                                    |                |             | 0.14           |            |             | 0.061          |
| 0                                                                                 | 8 (17%)        | 3 (6.5%)    |                | 11 (26%)   | 3 (7.1%)    |                |
| 1                                                                                 | 15 (33%)       | 12 (26%)    |                | 20 (47%)   | 21 (50%)    |                |
| 2                                                                                 | 22 (48%)       | 31 (67%)    |                | 10 (23%)   | 17 (40%)    |                |
| 3                                                                                 | 1 (2.2%)       | 0 (0%)      |                | 2 (4.7%)   | 1 (2.4%)    |                |
| Sleep Efficiency                                                                  |                |             | 0.5            |            |             | 0.6            |
| 0                                                                                 | 34 (74%)       | 29 (63%)    |                | 26 (60%)   | 20 (48%)    |                |
| 1                                                                                 | 7 (15%)        | 13 (28%)    |                | 12 (28%)   | 14 (33%)    |                |
| 2                                                                                 | 3 (6.5%)       | 3 (6.5%)    |                | 2 (4.7%)   | 2 (4.8%)    |                |
| 3                                                                                 | 2 (4.3%)       | 1 (2.2%)    |                | 3 (7.0%)   | 6 (14%)     |                |
| Sleep Disturbances                                                                |                |             | 0.2            |            |             | 0.4            |
| 0                                                                                 | 5 (11%)        | 11 (24%)    |                | 4 (9.3%)   | 7 (17%)     |                |
| 1                                                                                 | 40 (87%)       | 35 (76%)    |                | 37 (86%)   | 31 (74%)    |                |
| 2                                                                                 | 1 (2.2%)       | 0 (0%)      |                | 2 (4.7%)   | 4 (9.5%)    |                |
| Medication                                                                        |                |             | 0.7            |            |             | >0.9           |
| 0                                                                                 | 43 (93%)       | 45 (98%)    |                | 42 (98%)   | 41 (98%)    |                |
| 1                                                                                 | 1 (2.2%)       | 1 (2.2%)    |                | 1 (2.3%)   | 1 (2.4%)    |                |
| 2                                                                                 | 1 (2.2%)       | 0 (0%)      |                | 0 (0%)     | 0 (0%)      |                |
| 3                                                                                 | 1 (2.2%)       | 0 (0%)      |                | 0 (0%)     | 0 (0%)      |                |
| Daytime Dysfunction                                                               |                |             | 0.3            |            |             | >0.9           |
| 0                                                                                 | 18 (39%)       | 24 (52%)    |                | 20 (47%)   | 19 (45%)    |                |
| 1                                                                                 | 27 (59%)       | 22 (48%)    |                | 20 (47%)   | 20 (48%)    |                |
| 2                                                                                 | 1 (2.2%)       | 0 (0%)      |                | 3 (7.0%)   | 3 (7.1%)    |                |
